# Supplementary material for: Comparative Analysis between Salmonella enterica Isolated from Imported and Chinese Native Chicken Breeds
Source: MDPI journal article supplement (doi:10.3390/microorganisms11020390), 2023-02-03
Supplement: s1 [file s1]

**Table S1.** The primers used for confirming *Salmonella* and *S. Pullorum*.

| Target gene | Primer sequence (5'-3')   | Product size (bp) | Annealing temperature (°C) | Reference |
|-------------|---------------------------|-------------------|----------------------------|-----------|
| <i>IpaJ</i> | F TACCTGTCTGCTGCCGTGA     | 740               | 58                         | [10]      |
|             | R ACCCTGCAAACCTGAAATC     |                   |                            |           |
| <i>FimW</i> | F AACAGTCACTTTGAGCATGGGTT | 477               | 50                         | [38]      |
|             | R GAGTGACTTTGTCTGCTCTTCA  |                   |                            |           |

**Table S2.** The primer sequences of antimicrobial resistance gene.

| Target gene                | Primer sequence (5'-3')  | Annealing temperature (°C) | Reference |
|----------------------------|--------------------------|----------------------------|-----------|
| <i>bla<sub>TEM</sub></i>   | F ATAAAATTCTTGAAGACGAAA  | 57                         | [43]      |
|                            | R GACAGTTACCAATGCTTAATC  |                            |           |
| <i>bla<sub>SHV</sub></i>   | F TTATCTCCCTGTTAGCCACC   | 57                         | [43]      |
|                            | R GATTGCTGATTTCGCTCGG    |                            |           |
| <i>bla<sub>CTX-M</sub></i> | F CGCTTTGCGATGTGCAG      | 54                         | [44]      |
|                            | R ACCGCGATATCGTTGGT      |                            |           |
| <i>bla<sub>VIM</sub></i>   | F GATGGTGTTTGGTCGCATA    | 55                         | [44]      |
|                            | R CGAATGCGCAGCACCAG      |                            |           |
| <i>bla<sub>NDM</sub></i>   | F GGTGTTGGCGATCTGGTTTTTC | 52                         | [44]      |
|                            | R CGGAATGGCTCATCACGATC   |                            |           |
| <i>bla<sub>IMP</sub></i>   | F GGAATAGAGTGGCTTAAYTCTC | 60                         | [44]      |
|                            | R GGTTTAAYAAAACAACCACC   |                            |           |
| <i>bla<sub>MIR</sub></i>   | F TCG GTAAAGCCGATGTTGCGG | 64                         | [45]      |
|                            | R CTT CCACTGCGGCTGCCAGTT |                            |           |
| <i>bla<sub>DHA</sub></i>   | F AACTTTCACAGGTGTGCTGGGT | 64                         | [45]      |
|                            | R AACTTTCACAGGTGTGCTGGGT |                            |           |
| <i>qnrC</i>                | F GGTGTACATTTATTGAATC    | 50                         | [46]      |
|                            | R TCCACTTTACGAGGTTCT     |                            |           |
| <i>oqxA</i>                | F GATCAGTCAGTGGGATAGTTT  | 55                         | [47]      |
|                            | R TACTCGGCGTTAACTGATTA   |                            |           |

|              |                                                     |    |      |
|--------------|-----------------------------------------------------|----|------|
| <i>AAC2</i>  | F ACTGTGATGGGATACGCGTC<br>R CTCCGTCAGCGTTTCAGCTA    | 58 | [48] |
| <i>AAC4</i>  | F CTTCAGGATGGCAAGTTGGT<br>R TCATCTCGTTCTCCGCTCAT    | 58 | [48] |
| <i>tetA</i>  | F GCGCCTTTCCTTTGGGTTCT<br>R CCACCCGTTCCACGTTGTTA    | 62 | [48] |
| <i>tetB</i>  | F CATTAATAGGCGCATCGCTG<br>R TGAAGGTCATCGATAGCAGG    | 57 | [48] |
| <i>tetC</i>  | F TTGCGGGATATCGTCCATTC<br>R CATGCCAACCCGTTCCATGT    | 62 | [48] |
| <i>sul1</i>  | F CTTCGATGAGAGCCGGCGGC<br>R GCAAGGCGGAAACCCGCGCC    | 58 | [49] |
| <i>sul2</i>  | F GCGCTCAAGGCAGATGGCATT<br>R GCGTTTGATAACCGGCACCCGT | 50 | [49] |
| <i>Mcr-1</i> | F CGGTCAGTCCGTTTGTTC<br>R CTTGGTCGGTCTGTAGGG        | 55 | [28] |
| <i>Mcr-2</i> | F TGTTGCTTGTGCCGATTGGA<br>R AGATGGTATTGTTGGTTGCTG   | 65 | [28] |
| <i>Mcr-3</i> | F TTGGCACTGTATTTTGCATTT<br>R TTAACGAAATTGGCTGGAACA  | 50 | [28] |
| <i>Mcr-4</i> | F ATTGGGATAGTCGCCTTTTT<br>R TTACAGCCAGAATCATTATCA   | 56 | [50] |

**Table S3.** The PCR conditions and size of PCR products among 21 antimicrobial resistance genes.

| Target gene                 | Procedures       |              |           |            |        |            |     | Amplicon size(bp) | Reference |
|-----------------------------|------------------|--------------|-----------|------------|--------|------------|-----|-------------------|-----------|
|                             | Pre-denaturation | Denaturation | Annealing | Elongation | Cycles | Elongation |     |                   |           |
| <i>bla</i> <sub>TEM</sub>   | 94°C 5min        | 94°C 60s     | 57°C 60s  | 72°C 1min  | 35     | 72°C 10min | 643 | [43]              |           |
| <i>bla</i> <sub>SHV</sub>   | 94°C 5min        | 94°C 30s     | 57°C 30s  | 72°C 1min  | 30     | 72°C 10min | 860 | [43]              |           |
| <i>bla</i> <sub>CTX-M</sub> | 94°C 5min        | 94°C 30s     | 54°C 30s  | 72°C 1min  | 32     | 72°C 10min | 550 | [44]              |           |
| <i>bla</i> <sub>VIM</sub>   | 94°C 10min       | 94°C 30s     | 55°C 40s  | 72°C 45s   | 30     | 72°C 10min | 390 | [44]              |           |
| <i>bla</i> <sub>NDM</sub>   | 94°C 10min       | 94°C 30s     | 52°C 40s  | 72°C 50S   | 36     | 72°C 5min  | 621 | [44]              |           |
| <i>bla</i> <sub>IMP</sub>   | 94°C 10min       | 94°C 30s     | 60°C 40s  | 72°C 50S   | 36     | 72°C 5min  | 232 | [44]              |           |
| <i>bla</i> <sub>MIR</sub>   | 94°C 3min        | 94°C 30s     | 64°C 30s  | 72°C 60S   | 25     | 72°C 7min  | 302 | [45]              |           |

|                           |            |          |          |           |    |            |     |      |
|---------------------------|------------|----------|----------|-----------|----|------------|-----|------|
| <i>bla<sub>DBHA</sub></i> | 94°C 3min  | 94°C 30s | 64°C 30s | 72°C 60S  | 25 | 72°C 7min  | 405 | [45] |
| <i>qnrC</i>               | 94°C 5min  | 94°C 30s | 50°C 30s | 72°C 1min | 32 | 72°C 10min | 666 | [46] |
| <i>oqxA</i>               | 94°C 5min  | 94°C 30s | 55°C 30s | 72°C 1min | 32 | 72°C 10min | 670 | [47] |
| <i>AAC2</i>               | 95°C 5min  | 94°C 30s | 58°C 30s | 72°C 1min | 32 | 72°C 10min | 482 | [48] |
| <i>AAC4</i>               | 95°C 5min  | 94°C 30s | 58°C 30s | 72°C 1min | 32 | 72°C 10min | 286 | [48] |
| <i>tetA</i>               | 95°C 5min  | 94°C 30s | 50°C 30s | 72°C 45s  | 30 | 72°C 10min | 937 | [48] |
| <i>tetB</i>               | 95°C 5min  | 94°C 30s | 50°C 30s | 72°C 45s  | 30 | 72°C 10min | 416 | [48] |
| <i>tetC</i>               | 95°C 10min | 95°C 30s | 55°C 60s | 72°C 60s  | 30 | 72°C 7min  | 510 | [48] |
| <i>sul1</i>               | 95°C 5min  | 94°C 30s | 58°C 30s | 72°C 45s  | 28 | 72°C 10min | 238 | [49] |
| <i>sul2</i>               | 95°C 5min  | 94°C 30s | 50°C 30s | 72°C 45s  | 32 | 72°C 10min | 793 | [49] |
| <i>Mcr-1</i>              | 94°C 4min  | 94°C 30s | 55°C 60s | 72°C 60s  | 30 | 72°C 10min | 309 | [28] |
| <i>Mcr-2</i>              | 95°C 3min  | 95°C 30s | 55°C 30s | 72°C 60s  | 30 | 72°C 10min | 567 | [28] |
| <i>Mcr-3</i>              | 94°C 4min  | 94°C 30s | 50°C 60s | 72°C 60s  | 30 | 72°C 10min | 542 | [28] |
| <i>Mcr-4</i>              | 94°C 4min  | 94°C 30s | 56°C 60s | 72°C 60s  | 32 | 72°C 10min | 487 | [50] |

**Table S4:** The characteristics of 94 *Salmonella* isolates.

| Isolate | Location | Farm      | breed                       | Sreotype          | ESBL<br>phenotype | Resistance<br>profiles          | Resistance<br>genes                                                      |
|---------|----------|-----------|-----------------------------|-------------------|-------------------|---------------------------------|--------------------------------------------------------------------------|
| 20TA01  | Tai'an   | Farm<br>A | White<br>feather<br>broiler | S.<br>Enteritidis | -                 | TET-DOX-<br>STR-AMP             | <i>bla<sub>TEM</sub></i> ,<br><i>tetA</i> , <i>tetB</i> ,<br><i>sul1</i> |
| 20TA02  | Tai'an   | Farm<br>A | White<br>feather<br>broiler | S.<br>Enteritidis | -                 | TET-DOX-<br>STR-<br>AMX-<br>AMP | <i>bla<sub>TEM</sub></i> ,<br><i>tetA</i> , <i>sul1</i>                  |
| 20TA03  | Tai'an   | Farm<br>A | White<br>feather<br>broiler | S.<br>Enteritidis | -                 | TET-DOX-<br>STR-<br>AMX-<br>AMP | <i>bla<sub>TEM</sub></i> ,<br><i>tetA</i> , <i>tetB</i> ,<br><i>sul1</i> |
| 20TA04  | Tai'an   | Farm<br>A | White<br>feather<br>broiler | S.<br>Enteritidis | -                 | TET-DOX-<br>STR-AMP             | <i>bla<sub>TEM</sub></i> ,<br><i>tetA</i> , <i>tetB</i> ,<br><i>sul1</i> |
| 20TA05  | Tai'an   | Farm<br>A | White<br>feather<br>broiler | S.<br>Enteritidis | -                 | TET-DOX-<br>STR-<br>AMX-<br>AMP | <i>bla<sub>TEM</sub></i> , <i>sul1</i>                                   |
| 20TA06  | Tai'an   | Farm<br>A | White<br>feather<br>broiler | S.<br>Enteritidis | -                 | TET-DOX-<br>STR-<br>AMX-<br>AMP | <i>bla<sub>TEM</sub></i> ,<br><i>tetA</i> , <i>tetB</i> ,<br><i>sul1</i> |

|        |        |           |                             |                   |   |                                    |                                                                                            |
|--------|--------|-----------|-----------------------------|-------------------|---|------------------------------------|--------------------------------------------------------------------------------------------|
| 20TA07 | Tai'an | Farm<br>A | White<br>feather<br>broiler | S.<br>Enteritidis | - | TET-DOX-<br>STR-<br>AMX-<br>AMP    | <i>bla</i> <sub>TEM</sub> ,<br><i>tetA</i>                                                 |
| 20TA08 | Tai'an | Farm<br>A | White<br>feather<br>broiler | S.<br>Enteritidis | - | TET-DOX-<br>STR-<br>AMX-<br>AMP    | <i>bla</i> <sub>TEM</sub>                                                                  |
| 20TA09 | Tai'an | Farm<br>A | White<br>feather<br>broiler | S.<br>Enteritidis | - | TET-STR-<br>AMX-<br>AMP            | <i>bla</i> <sub>TEM</sub> ,<br><i>tetA</i>                                                 |
| 20TA10 | Tai'an | Farm<br>A | White<br>feather<br>broiler | S.<br>Enteritidis | - | TET-DOX-<br>STR-<br>AMX-<br>AMP    | <i>bla</i> <sub>TEM</sub> ,<br><i>tetA</i> , <i>tetB</i> ,<br><i>tetC</i> , <i>sul1</i>    |
| 20TA11 | Tai'an | Farm<br>A | White<br>feather<br>broiler | S.<br>Enteritidis | - | TET-DOX-<br>GM-STR-<br>AMX-<br>AMP | <i>bla</i> <sub>TEM</sub> ,<br><i>AAC2</i> ,<br><i>tetA</i> , <i>tetB</i> ,<br><i>sul1</i> |
| 20TA12 | Tai'an | Farm<br>A | White<br>feather<br>broiler | S.<br>Enteritidis | - | TET-DOX-<br>STR-<br>AMX-<br>AMP    | <i>bla</i> <sub>TEM</sub> ,<br><i>tetA</i> , <i>sul1</i>                                   |
| 20TA13 | Tai'an | Farm<br>A | White<br>feather<br>broiler | S.<br>Enteritidis | - | TET-DOX-<br>STR-<br>AMX-<br>AMP    | <i>bla</i> <sub>TEM</sub> ,<br><i>tetA</i> , <i>tetB</i>                                   |
| 20TA14 | Tai'an | Farm<br>A | White<br>feather<br>broiler | S.<br>Enteritidis | - | TET-DOX-<br>STR-<br>AMX-<br>AMP    | <i>bla</i> <sub>TEM</sub>                                                                  |
| 20TA15 | Tai'an | Farm<br>A | White<br>feather<br>broiler | S.<br>Enteritidis | - | STR-<br>AMX-<br>AMP                | <i>bla</i> <sub>TEM</sub> ,<br><i>tetA</i> , <i>tetB</i>                                   |
| 20TA16 | Tai'an | Farm<br>A | White<br>feather<br>broiler | S.<br>Enteritidis | - | TET-DOX-<br>STR-<br>AMX-<br>AMP    | <i>bla</i> <sub>TEM</sub> ,<br><i>tetA</i> , <i>tetB</i> ,<br><i>sul1</i>                  |
| 20TA17 | Tai'an | Farm<br>A | White<br>feather<br>broiler | S.<br>Enteritidis | - | TET-STR-<br>AMP                    | <i>bla</i> <sub>TEM</sub> ,<br><i>tetA</i> , <i>tetB</i>                                   |
| 20TA18 | Tai'an | Farm<br>A | White<br>feather<br>broiler | S.<br>Enteritidis | - | AMX-<br>AMP-FOX                    | <i>bla</i> <sub>TEM</sub> ,<br><i>tetA</i> , <i>tetB</i> ,<br><i>sul1</i>                  |

|        |        |           |                             |                   |   |                                 |                                                                           |
|--------|--------|-----------|-----------------------------|-------------------|---|---------------------------------|---------------------------------------------------------------------------|
| 20TA19 | Tai'an | Farm<br>A | White<br>feather<br>broiler | S.<br>Enteritidis | - | AMX-<br>AMP                     | <i>bla</i> <sub>TEM</sub> ,<br><i>tetA</i> , <i>tetB</i> ,<br><i>sul1</i> |
| 20TA20 | Tai'an | Farm<br>A | White<br>feather<br>broiler | S.<br>Enteritidis | - | STR-<br>AMX-<br>AMP             | <i>bla</i> <sub>TEM</sub> ,<br><i>tetA</i> , <i>tetB</i> ,<br><i>sul1</i> |
| 20TA21 | Tai'an | Farm<br>A | White<br>feather<br>broiler | S.<br>Enteritidis | - | TET-<br>AMX-<br>AMP             | <i>bla</i> <sub>TEM</sub> ,<br><i>tetA</i> , <i>tetB</i> ,<br><i>sul1</i> |
| 20TA22 | Tai'an | Farm<br>A | White<br>feather<br>broiler | S.<br>Enteritidis | - | TET-<br>AMX-<br>AMP             | <i>bla</i> <sub>TEM</sub> ,<br><i>tetA</i> , <i>tetB</i> ,<br><i>sul1</i> |
| 20TA23 | Tai'an | Farm<br>A | White<br>feather<br>broiler | S.<br>Enteritidis | - | TET-DOX-<br>STR-<br>AMX-<br>AMP | <i>bla</i> <sub>TEM</sub> ,<br><i>tetA</i> , <i>tetB</i> ,<br><i>sul1</i> |
| 20JN01 | Jining | Farm<br>B | Bairi                       | S.<br>Pullorum    | - | STR-<br>AMX-<br>AMP             | <i>bla</i> <sub>TEM</sub> ,<br><i>tetA</i>                                |
| 20JN02 | Jining | Farm<br>B | Bairi                       | S.<br>Pullorum    | - |                                 | <i>bla</i> <sub>TEM</sub>                                                 |
| 20JN03 | Jining | Farm<br>B | Bairi                       | S.<br>Pullorum    | - | AMX-<br>AMP                     | <i>bla</i> <sub>TEM</sub> ,<br><i>tetA</i> , <i>tetB</i>                  |
| 20JN04 | Jining | Farm<br>B | Bairi                       | S.<br>Enteritidis | - | TET-DOX-<br>STR-<br>AMX-<br>AMP | <i>bla</i> <sub>TEM</sub> ,<br><i>tetB</i> , <i>sul1</i>                  |
| 20JN05 | Jining | Farm<br>B | Bairi                       | S.<br>Pullorum    | - | AMX-<br>AMP                     | <i>bla</i> <sub>TEM</sub> , <i>tetB</i>                                   |
| 20JN06 | Jining | Farm<br>B | Bairi                       | S.<br>Pullorum    | - | STR-<br>AMX-<br>AMP             | <i>bla</i> <sub>TEM</sub> ,<br><i>tetA</i> , <i>tetB</i>                  |
| 20JN07 | Jining | Farm<br>B | Bairi                       | S.<br>Pullorum    | - | AMX-<br>AMP                     | <i>bla</i> <sub>TEM</sub> ,<br><i>tetA</i>                                |
| 20JN08 | Jining | Farm<br>B | Bairi                       | S.<br>Enteritidis | - | TET-DOX-<br>STR-<br>AMX-<br>AMP | <i>bla</i> <sub>TEM</sub> ,<br><i>tetA</i>                                |
| 20JN09 | Jining | Farm<br>B | Bairi                       | S.<br>Pullorum    | - | AMP                             | <i>bla</i> <sub>TEM</sub> ,<br><i>tetA</i> , <i>tetB</i> ,<br><i>sul1</i> |
| 20JN10 | Jining | Farm<br>B | Bairi                       | S.<br>Pullorum    | - | STR-<br>AMX-<br>AMP             | <i>bla</i> <sub>TEM</sub> ,<br><i>tetA</i> , <i>tetB</i> ,<br><i>sul1</i> |

|        |        |           |        |                   |   |                                 |                                                                                                            |
|--------|--------|-----------|--------|-------------------|---|---------------------------------|------------------------------------------------------------------------------------------------------------|
| 20JN11 | Jining | Farm<br>B | Bairi  | S.<br>Pullorum    | - | STR-<br>AMX-<br>AMP             | <i>bla</i> <sub>TEM</sub> ,<br><i>bla</i> <sub>CTX-M</sub> ,<br><i>tetA</i> , <i>tetB</i> ,<br><i>sul1</i> |
| 20JN12 | Jining | Farm<br>B | Bairi  | S.<br>Pullorum    | - | AMX-<br>AMP                     | <i>bla</i> <sub>TEM</sub> ,<br><i>tetA</i> , <i>tetB</i> ,<br><i>sul1</i>                                  |
| 20JN13 | Jining | Farm<br>B | Bairi  | S.<br>Pullorum    | - |                                 | <i>bla</i> <sub>TEM</sub> ,<br><i>tetA</i> , <i>tetB</i> ,<br><i>sul1</i>                                  |
| 20JN14 | Jining | Farm<br>B | Bairi  | S.<br>Enteritidis | - | TET-DOX-<br>STR-<br>AMX-<br>AMP | <i>bla</i> <sub>TEM</sub> ,<br><i>tetA</i> , <i>tetB</i> ,<br><i>sul1</i>                                  |
| 20JN15 | Jining | Farm<br>B | Bairi  | S.<br>Pullorum    | - | TET-DOX-<br>STR-<br>AMX-<br>AMP | <i>bla</i> <sub>TEM</sub> ,<br><i>tetA</i> , <i>tetB</i> ,<br><i>sul1</i>                                  |
| 20SD01 | Rizhao | Farm<br>C | Langya | S.<br>Thompson    | - | SXT-GM-<br>STR-<br>AMX-<br>AMP  | <i>bla</i> <sub>TEM</sub>                                                                                  |
| 20SD02 | Rizhao | Farm<br>C | Langya | S.<br>Thompson    | - | SXT-GM-<br>STR-<br>AMX-<br>AMP  | <i>bla</i> <sub>TEM</sub>                                                                                  |
| 20SD03 | Rizhao | Farm<br>C | Langya | S.<br>Thompson    | - | SXT-GM-<br>STR-<br>AMX-<br>AMP  | <i>bla</i> <sub>TEM</sub>                                                                                  |
| 20SD04 | Rizhao | Farm<br>C | Langya | S.<br>Thompson    | - | SXT-GM-<br>STR-<br>AMX-<br>AMP  | <i>bla</i> <sub>TEM</sub>                                                                                  |
| 20SD05 | Rizhao | Farm<br>C | Langya | S.<br>Thompson    | - | SXT-GM-<br>STR-<br>AMX-<br>AMP  | <i>bla</i> <sub>TEM</sub>                                                                                  |
| 20SD06 | Rizhao | Farm<br>C | Langya | S.<br>Thompson    | - | SXT-GM-<br>STR-<br>AMX-<br>AMP  | <i>bla</i> <sub>TEM</sub>                                                                                  |
| 20SD07 | Rizhao | Farm<br>C | Langya | S.<br>Thompson    | - | SXT-GM-<br>STR-                 | <i>bla</i> <sub>TEM</sub>                                                                                  |

|        |        |           |        |                |   |                                                           |                                            |
|--------|--------|-----------|--------|----------------|---|-----------------------------------------------------------|--------------------------------------------|
| 20SD08 | Rizhao | Farm<br>C | Langya | S.<br>Thompson | - | AMX-<br>AMP<br>SXT-TET-<br>DOX-GM-<br>STR-<br>AMX-<br>AMP | <i>bla</i> <sub>TEM</sub>                  |
| 20SD09 | Rizhao | Farm<br>C | Langya | S.<br>Thompson | - | SXT-GM-<br>STR-<br>AMX-<br>AMP                            | <i>bla</i> <sub>TEM</sub>                  |
| 20SD10 | Rizhao | Farm<br>C | Langya | S.<br>Thompson | - | SXT-TET-<br>DOX-GM-<br>STR-<br>AMX-<br>AMP                | <i>bla</i> <sub>TEM</sub>                  |
| 20SD11 | Rizhao | Farm<br>C | Langya | S.<br>Thompson | - | SXT-GM-<br>STR-AMX                                        | <i>bla</i> <sub>TEM</sub>                  |
| 20SD12 | Rizhao | Farm<br>C | Langya | S.<br>Thompson | - | SXT-GM-<br>STR-<br>AMX-<br>AMP                            | <i>bla</i> <sub>TEM</sub> ,<br><i>tetA</i> |
| 20SD13 | Rizhao | Farm<br>C | Langya | S.<br>Thompson | - | SXT-GM-<br>STR-<br>AMX-<br>AMP                            | <i>bla</i> <sub>TEM</sub> , <i>tetB</i>    |
| 20SD14 | Rizhao | Farm<br>C | Langya | S.<br>Thompson | - | SXT-GM-<br>STR-AMX                                        | <i>bla</i> <sub>TEM</sub>                  |
| 20SD15 | Rizhao | Farm<br>C | Langya | S.<br>Thompson | - | SXT-GM-<br>STR-<br>AMX-<br>AMP                            | <i>bla</i> <sub>TEM</sub> , <i>sul2</i>    |
| 20SD16 | Rizhao | Farm<br>C | Langya | S.<br>Thompson | - | SXT-GM-<br>STR-<br>AMX-<br>AMP                            | <i>bla</i> <sub>TEM</sub>                  |
| 20SD17 | Rizhao | Farm<br>C | Langya | S.<br>Thompson | - | SXT-GM-<br>AMX-<br>AMP                                    | <i>bla</i> <sub>TEM</sub>                  |
| 20SD18 | Rizhao | Farm<br>C | Langya | S.<br>Thompson | - | GM-STR-<br>AMX-<br>AMP                                    | <i>bla</i> <sub>TEM</sub>                  |
| 20SD19 | Rizhao | Farm<br>C | Langya | S.<br>Thompson | - | SXT-GM-<br>STR-                                           | <i>bla</i> <sub>TEM</sub>                  |

|        |        |           |        |                |   |                                               |                                                          |
|--------|--------|-----------|--------|----------------|---|-----------------------------------------------|----------------------------------------------------------|
| 20SD20 | Rizhao | Farm<br>C | Langya | S.<br>Thompson | - | AMX-<br>AMP<br>SXT-GM-<br>STR-<br>AMX-<br>AMP | <i>bla</i> <sub>TEM</sub>                                |
| 20SD21 | Rizhao | Farm<br>C | Langya | S.<br>Thompson | - | SXT-GM-<br>STR-<br>AMX-<br>AMP                | <i>bla</i> <sub>TEM</sub>                                |
| 20SD22 | Rizhao | Farm<br>C | Langya | S.<br>Thompson | - | SXT-GM-<br>STR-<br>AMX-<br>AMP                | <i>bla</i> <sub>TEM</sub>                                |
| 20SD23 | Rizhao | Farm<br>C | Langya | S.<br>Thompson | - | SXT-GM-<br>STR-<br>AMX-<br>AMP                | <i>bla</i> <sub>TEM</sub>                                |
| 20SD24 | Rizhao | Farm<br>C | Langya | S.<br>Thompson | - | SXT-GM-<br>STR-<br>AMX-<br>AMP                | <i>bla</i> <sub>TEM</sub> , <i>tetB</i>                  |
| 20SD25 | Rizhao | Farm<br>C | Langya | S.<br>Thompson | - | SXT-GM-<br>STR-<br>AMX-<br>AMP                | <i>bla</i> <sub>TEM</sub>                                |
| 20SD26 | Rizhao | Farm<br>C | Langya | S.<br>Thompson | - | SXT-GM-<br>STR-<br>AMX-<br>AMP                | <i>bla</i> <sub>TEM</sub> ,<br><i>tetA</i> , <i>tetB</i> |
| 20SD27 | Rizhao | Farm<br>C | Langya | S.<br>Thompson | - | SXT-GM-<br>STR-<br>AMX-<br>AMP                | <i>bla</i> <sub>TEM</sub>                                |
| 20SD28 | Rizhao | Farm<br>C | Langya | S.<br>Thompson | - | SXT-GM-<br>STR-<br>AMX-<br>AMP                | <i>bla</i> <sub>TEM</sub>                                |
| 20SD29 | Rizhao | Farm<br>C | Langya | S.<br>Thompson | - | SXT-GM-<br>AMX-<br>AMP                        | <i>bla</i> <sub>TEM</sub>                                |
| 20SD30 | Rizhao | Farm<br>C | Langya | S.<br>Thompson | - | SXT-<br>AMX-<br>AMP                           | <i>bla</i> <sub>TEM</sub>                                |



|        |        |           |        |                |   |                                 |                                                                                         |
|--------|--------|-----------|--------|----------------|---|---------------------------------|-----------------------------------------------------------------------------------------|
| 20SD31 | Rizhao | Farm<br>C | Langya | S.<br>Thompson | - | STR-<br>AMX-<br>AMP             | <i>bla</i> <sub>TEM</sub> ,<br><i>tetA</i>                                              |
| 20SD32 | Rizhao | Farm<br>C | Langya | S.<br>Thompson | - | STR-<br>AMX-<br>AMP             | <i>bla</i> <sub>TEM</sub>                                                               |
| 20LH06 | Jining | Farm<br>D | Luhua  | S.<br>Pullorum | + | STR-CAZ                         | <i>bla</i> <sub>TEM</sub> , <i>tetB</i>                                                 |
| 20LH07 | Jining | Farm<br>D | Luhua  | S.<br>Pullorum | + | STR-CAZ                         | <i>bla</i> <sub>TEM</sub>                                                               |
| 20LH08 | Jining | Farm<br>D | Luhua  | S.<br>Pullorum | - | STR-CAZ                         | <i>bla</i> <sub>TEM</sub> , <i>tetB</i>                                                 |
| 20LH09 | Jining | Farm<br>D | Luhua  | S.<br>Pullorum | - | STR-CAZ                         | <i>bla</i> <sub>TEM</sub>                                                               |
| 20LH10 | Jining | Farm<br>D | Luhua  | S.<br>Pullorum | - | STR-CAZ                         | <i>bla</i> <sub>TEM</sub> ,<br><i>tetA</i> , <i>tetB</i>                                |
| 20LH11 | Jining | Farm<br>D | Luhua  | S.<br>Pullorum | + | STR-CAZ                         | <i>bla</i> <sub>TEM</sub> ,<br><i>tetA</i> , <i>tetB</i>                                |
| 20LH12 | Jining | Farm<br>D | Luhua  | S.<br>Pullorum | + | TET-STR-<br>AMX-<br>AMP-<br>CAZ | <i>bla</i> <sub>TEM</sub> , <i>tetB</i>                                                 |
| 20LH13 | Jining | Farm<br>D | Luhua  | S.<br>Pullorum | - | STR-CAZ                         | <i>bla</i> <sub>TEM</sub>                                                               |
| 20LH14 | Jining | Farm<br>D | Luhua  | S.<br>Pullorum | - | TET-STR                         | <i>bla</i> <sub>TEM</sub> ,<br><i>tetA</i>                                              |
| 20LH15 | Jining | Farm<br>D | Luhua  | S.<br>Pullorum | - | STR-FOX-<br>CAZ                 | <i>bla</i> <sub>TEM</sub>                                                               |
| 20LH16 | Jining | Farm<br>D | Luhua  | S.<br>Pullorum | + | STR-<br>AMX-<br>AMP-<br>CAZ     | <i>bla</i> <sub>TEM</sub> , <i>tetB</i>                                                 |
| 20LH17 | Jining | Farm<br>D | Luhua  | S.<br>Pullorum | + | STR-CAZ                         | <i>bla</i> <sub>TEM</sub> ,<br><i>tetA</i> , <i>tetB</i> ,<br><i>sul1</i> , <i>sul2</i> |
| 20LH18 | Jining | Farm<br>D | Luhua  | S.<br>Pullorum | - | STR-<br>AMX-<br>AMP-<br>CAZ     | <i>bla</i> <sub>TEM</sub> , <i>tetB</i>                                                 |
| 20LH19 | Jining | Farm<br>D | Luhua  | S.<br>Pullorum | - | AMX-<br>AMP                     | <i>bla</i> <sub>TEM</sub> ,<br><i>tetA</i> , <i>tetB</i> ,<br><i>sul1</i>               |
| 20LH20 | Jining | Farm<br>D | Luhua  | S.<br>Pullorum | - | STR-CAZ                         | <i>bla</i> <sub>TEM</sub> ,<br><i>tetA</i> , <i>tetB</i>                                |

|        |        |           |       |                |   |                                    |                                                          |
|--------|--------|-----------|-------|----------------|---|------------------------------------|----------------------------------------------------------|
| 20LH21 | Jining | Farm<br>D | Luhua | S.<br>Pullorum | - | STR-CAZ                            | <i>bla</i> <sub>TEM</sub>                                |
| 20LH22 | Jining | Farm<br>D | Luhua | S.<br>Pullorum | + | STR-CAZ                            | <i>bla</i> <sub>TEM</sub> ,<br><i>tetA</i> , <i>tetB</i> |
| 20LH23 | Jining | Farm<br>D | Luhua | S.<br>Pullorum | - | STR-CAZ                            | <i>bla</i> <sub>TEM</sub> ,<br><i>tetA</i> , <i>tetB</i> |
| 20LH24 | Jining | Farm<br>D | Luhua | S.<br>Pullorum | - | STR-<br>AMX-<br>AMP-FOX<br>STR-CAZ | <i>bla</i> <sub>TEM</sub> ,<br><i>tetA</i> , <i>tetB</i> |
| 20LH25 | Jining | Farm<br>D | Luhua | S.<br>Pullorum | - | STR-CAZ                            | <i>bla</i> <sub>TEM</sub>                                |
| 20LH26 | Jining | Farm<br>D | Luhua | S.<br>Pullorum | + | CAZ                                | <i>bla</i> <sub>TEM</sub>                                |
| 20LH27 | Jining | Farm<br>D | Luhua | S.<br>Pullorum | - | TET-STR-<br>CAZ                    | <i>bla</i> <sub>TEM</sub>                                |
| 20LH28 | Jining | Farm<br>D | Luhua | S.<br>Pullorum | - | STR                                | <i>bla</i> <sub>TEM</sub>                                |
| 20LH29 | Jining | Farm<br>D | Luhua | S.<br>Pullorum | - | STR                                | <i>bla</i> <sub>TEM</sub>                                |

---
